# Supplementary material
Source: publisher figshare collection journal article supplement (https://acs.figshare.com/ndownloader/files/3910468)
Supplement: Supplementary file 1 [file 3910468]

**SUPPORTING INFORMATION for**

**Comparative *In Vitro* Toxicity of Nitrosamines and Nitramines Associated with Amine-Based Carbon Capture and Storage**

Elizabeth D. Wagner,<sup>†,§</sup> Jennifer Osiol,<sup>†</sup> William A. Mitch<sup>‡</sup> and Michael J. Plewa<sup>\*,†,§</sup>

<sup>†</sup>Department of Crop Science, University of Illinois at Urbana-Champaign, Urbana, IL 61801.

<sup>§</sup>Science and Technology Center for Advanced Materials for the Purification of Water with Systems, University of Illinois at Urbana-Champaign, Urbana IL 61801.

<sup>‡</sup> Department of Civil and Environmental Engineering, Stanford University, Stanford, CA 94305

\*Corresponding author

**19 pages**

**2 Tables**

**9 Figures**

|    |                                                                                                  |
|----|--------------------------------------------------------------------------------------------------|
| 22 | <b>Table of Contents</b>                                                                         |
| 23 |                                                                                                  |
| 24 | Table S1: Chemical agents evaluated in this study                                                |
| 25 | <i>S. typhimurium</i> Cells                                                                      |
| 26 | <i>S. typhimurium</i> Microsuspension Mutagenicity Assay                                         |
| 27 | Suspension Versus Plate Incorporation Assays                                                     |
| 28 | Chinese Hamster Ovary (CHO) Cell Assays                                                          |
| 29 | CHO Cell Chronic Cytotoxicity Assay                                                              |
| 30 | Single Cell Gel Electrophoresis Assay (SCGE)                                                     |
| 31 | Figure S7. Comparison of CHO Cell Cytotoxicity and Genotoxicity Among the Nitrosamines           |
| 32 | and Nitramines                                                                                   |
| 33 |                                                                                                  |
| 34 | Figure S8. Comparison Between CHO Cell Genotoxicity with <i>S. typhimurium</i> Mutagenicity      |
| 35 | Figure S9. A comparison of the <i>N</i> -nitrosodimethylamine equivalent mutagenicity values for |
| 36 | agents positive in <i>S. typhimurium</i> strain YG7108 +S9 metabolic activation.                 |

The agents analyzed for their *in vitro* toxicity are listed in Table S1.

| Table S1 Description of nitrosamines and nitramines evaluated in this study |                                                              |             |                    |                                                                                       |
|-----------------------------------------------------------------------------|--------------------------------------------------------------|-------------|--------------------|---------------------------------------------------------------------------------------|
| Name                                                                        | Formula                                                      | CASN        | Source             | Structure                                                                             |
| <i>N</i> -Nitrosodiethanolamine                                             | C <sub>4</sub> H <sub>10</sub> N <sub>2</sub> O <sub>3</sub> | 1116-54-7   | Sigma Chem. Co     | 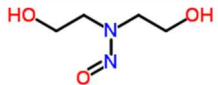   |
| <i>N</i> -Nitrodiethanolamine                                               | C <sub>4</sub> H <sub>10</sub> N <sub>2</sub> O <sub>4</sub> | 4185-47-1   | CanSyn Chem. Co.   |    |
| <i>N</i> -Nitromonoethanolamine                                             | C <sub>2</sub> H <sub>6</sub> N <sub>2</sub> O <sub>3</sub>  | unavailable | Toronto Res. Chem. |    |
| <i>N</i> -Nitrosomorpholine                                                 | C <sub>4</sub> H <sub>8</sub> N <sub>2</sub> O <sub>2</sub>  | 59-89-2     | Sigma Chem. Co     |    |
| <i>N</i> -Nitromorpholine                                                   | C <sub>4</sub> H <sub>8</sub> N <sub>2</sub> O <sub>3</sub>  | 4164-32-3   | Sigma Chem. Co     |    |
| <i>N</i> -Nitrosodimethylamine                                              | C <sub>2</sub> H <sub>6</sub> N <sub>2</sub> O               | 62-75-9     | Chem. Service Co   |   |
| <i>N</i> -Nitrodimethylamine                                                | C <sub>2</sub> H <sub>6</sub> N <sub>2</sub> O <sub>2</sub>  | 4164-28-7   | CanSyn Chem. Co.   |  |
| 1-Nitrosopiperazine                                                         | C <sub>4</sub> H <sub>9</sub> N <sub>3</sub> O               | 5632-47-3   | Toronto Res. Chem. |  |
| 1-Nitropiperazine                                                           | C <sub>4</sub> H <sub>9</sub> N <sub>3</sub> O <sub>2</sub>  | 42499-41-2  | CanSyn Chem. Co.   |  |
| 1,4-Dinitrosopiperazine                                                     | C <sub>4</sub> H <sub>8</sub> N <sub>4</sub> O <sub>2</sub>  | 140-79-4    | Toronto Res. Chem. |  |
| 1,4-Dinitropiperazine                                                       | C <sub>4</sub> H <sub>8</sub> N <sub>4</sub> O <sub>3</sub>  | 4164-37-8   | MP Bio-medicals    |  |

## *S. typhimurium* Cells

We employed *S. typhimurium* tester strain YG7108 (*hisG46*, *rfa*<sup>-</sup>;  $\Delta(chl, uvrB, bio)$   $\Delta ada_{ST}$ ; *ogt*<sub>ST</sub>; *Cm*<sup>r</sup>; *Amp*<sup>r</sup>) with and without mammalian microsomal activation. Reverse mutation is measured at *hisG46* (Figure S1).<sup>1, 2</sup> *S. typhimurium* strain YG7108 is highly sensitive to nitrosamines and other alkylating agents and was provided by Dr. T. Nohmi, National Institute of Health Sciences, Tokyo, Japan.<sup>3</sup>

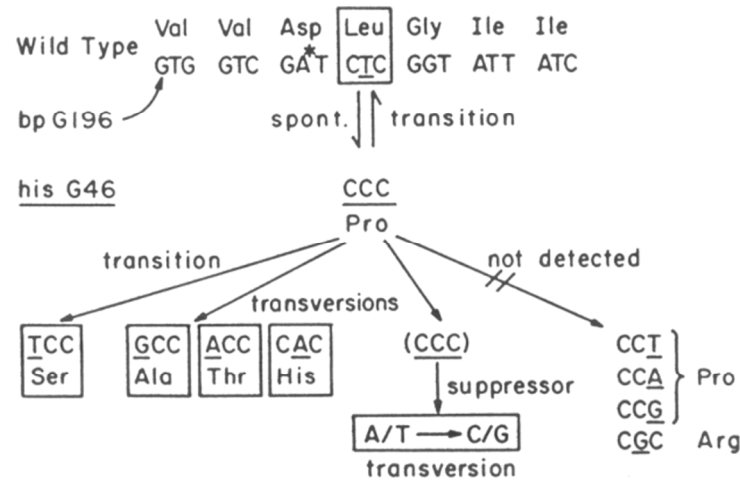

Figure S1. Reverse mutation at *hisG46* in *S. typhimurium* that leads to the growth of a visible colony on selective VB medium. The mutant colonies are referred to as revertants.

YG7108 was stored as a frozen culture in Luria-Bonner (LB) plus 10% dimethylsulfoxide (DMSO) at  $-80^{\circ}\text{C}$ . To construct a master plate, frozen log-phase *S. typhimurium* YG7108 cells were thawed and grown in 5 mL LB at  $37^{\circ}\text{C}$  overnight with shaking. The culture was streaked across an LB plate and incubated overnight at  $37^{\circ}\text{C}$ . The master plate was stored at  $4^{\circ}\text{C}$ . For the mutagenicity and cytotoxicity (survivorship) experiments a single colony isolate of *S. typhimuri-*

66 *um* YG7108 from the master plate was grown overnight in 100 mL LB medium with kanamycin  
67 (25 µg/mL) and chloramphenicol (10 µg/mL) at 37°C with shaking (200 rpm).<sup>3</sup> The following  
68 day the culture was centrifuged for 5 min at 5000 rpm (4096 ×g) using the GSA rotor in the  
69 RC5B Superspeed Centrifuge (Sorvall). The supernatant was discarded, and the bacterial pellet  
70 was suspended in 50 mL of 100 mM potassium-phosphate buffer, pH 7.4 (PPB). The suspension  
71 was centrifuged again for 5 min at 5000 rpm, and the supernatant was discarded. The pellet was  
72 suspended in 2.5-3 mL PPB. An aliquot (50 µL) of the bacteria was added to 4.95 mL PPB and  
73 the optical density was determined spectrophotometrically (660 nm). The titer of the suspension  
74 was adjusted to  $6 \times 10^9$  cells/mL and the cells were kept on ice until used in the microsuspension  
75 mutagenicity assay.<sup>4-6</sup> Most of the nitrosamines and nitramines require metabolic activation to  
76 exhibit mutagenicity. Metabolic activation of nitrosamines and nitramines is primarily dependent  
77 on cytochrome P-450 which converts nitrosamines into DNA alkylating agents<sup>7</sup>. For example  
78 N-nitrodibutylamine and N-nitrodiethylamine were activated by liver microsomes and hepato-  
79 cytes from rats treated with phenobarbital.<sup>8</sup> Nitrodimethylamine was activated with S9 micro-  
80 somes into mutagenic agents.<sup>9</sup> Oxidative transformation is an important route of metabolism of  
81 xenobiotics. These oxidative reactions are largely catalyzed by the monooxygenase system based  
82 on cytochrome P-450. The monooxygenase system is formed by the enzyme system of cyto-  
83 chrome P-450 and NADPH cytochrome P-450 reductase. The haemoprotein cytochrome P-450  
84 functions as the terminal oxidase involved in the hydroxylation of xenobiotics such as nitrosa-  
85 mines. A description of the cytochrome P-450-mediated monooxygenation of dimethylnitrosa-  
86 mine (NDMA) is presented in Figure S2.

## ***S. typhimurium* Microsuspension Mutagenicity Assay**

This assay was conducted in sterile round bottom 96-well microplates. Each reaction mixture (well) was composed of a known nitrosamine or nitramine concentration,  $3 \times 10^8$  cells, and PPB in a total volume of 100  $\mu$ L.

When including a mammalian microsomal-mediated activation system, 35  $\mu$ L of an S9 mix was added for a total volume of 100  $\mu$ L. S9 (post mitochondrial hepatic supernatant) from Aroclor 1254-induced male rats) was purchased from Moltex. The S9 mix consisted of 50 mM PPB pH 7.4, 10 mM  $\text{MgCl}_2$ , 5 mM glucose-6-phosphate, 30 mM KCl, and 4 mM

NADP plus 200  $\mu$ L/mL of Aroclor 1254-induced rat hepatic microsomal suspension (S9). The final S9 concentration in the treatment well was 7%. In general there were three microplate wells for each test agent concentration plus concurrent negative (buffer only) and positive controls (with S9 activation, NDMA, 250  $\mu$ M; without S9 activation, ethylmethanesulfonate, 188  $\mu$ M). The wells were sealed with AlumnaSeal to prevent any crossover volatilization or evaporation, and the microplate was placed in a plastic container and incubated at 37°C with shaking at 200

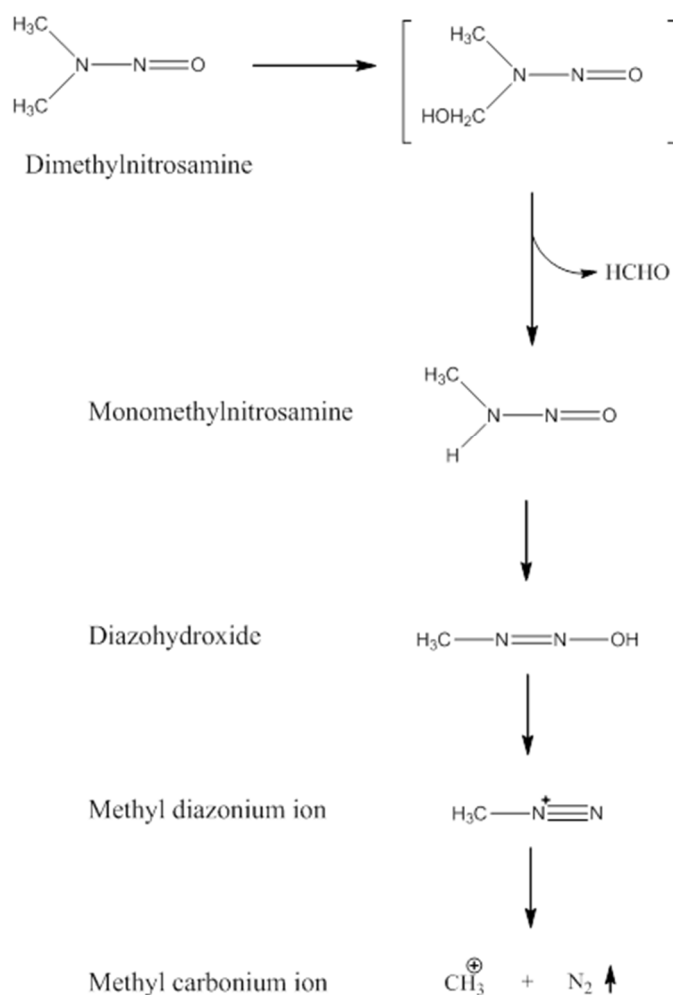

Figure S2. Metabolic activation of *N*-nitrosodimethylamine via cytochrome P-450 leading to the formation of a reactive methyl carbonium ion. This radical can alkylate DNA and induce mutation.

rpm for 60 min. After treatment, the entire contents of each well were added to 2 mL of molten histidine and biotin supplemented Vogel-Bonner (VB) top agar, mixed and poured onto selective VB plates. The plates were placed in a static 37°C incubator for 72 h. Histidine revertant colonies were counted by hand or with a New Brunswick Biotran III automatic colony counter. An example of revertant *S. typhimurium* colonies expressing mutagenicity induced by *N*-nitrodimethylamine is presented in Figure S3. The data were saved as an Excel spreadsheet. The data were analyzed from the Excel spreadsheet using the statistical and graphical functions of SigmaPlot 11 (Systat Software, Inc., San Jose, CA).

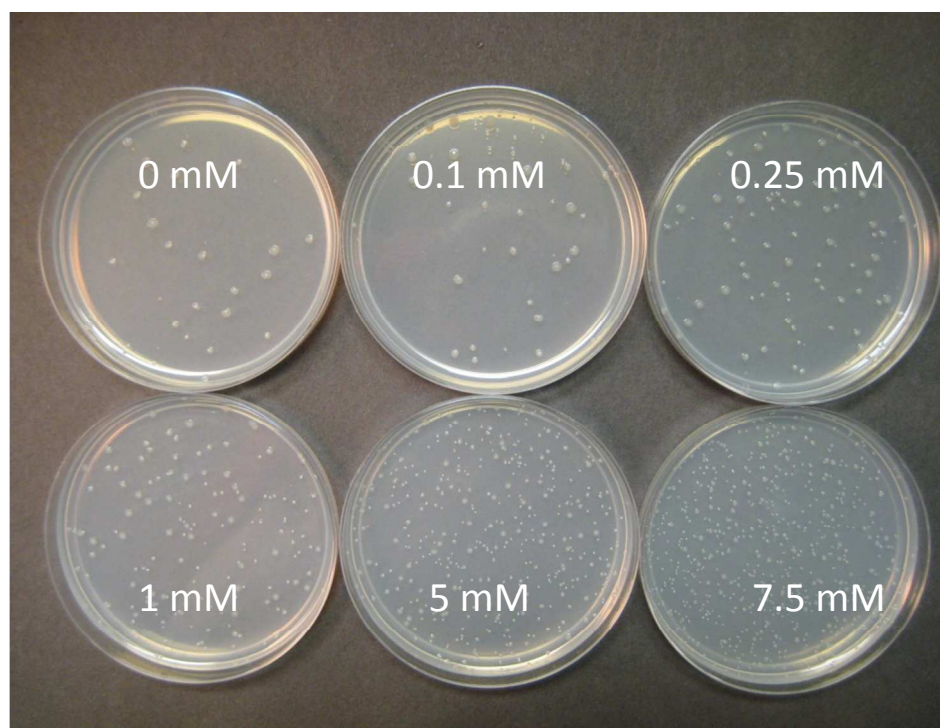

Figure S3. Mutagenicity of *N*-nitrodimethylamine in *S. typhimurium*, strain YG7108, after mammalian hepatic microsomal activation showing increasing numbers of histidine revertants as a function of the concentration of the nitramine.

Survivorship was measured by making serial dilutions from the treatment wells in PPB and plating on LB (complete media) plates. After incubation for 24 h the colonies were counted. The number of colonies from the negative control was set at 100% and the colonies from the treatment wells were compared and expressed as a percent of the negative control.

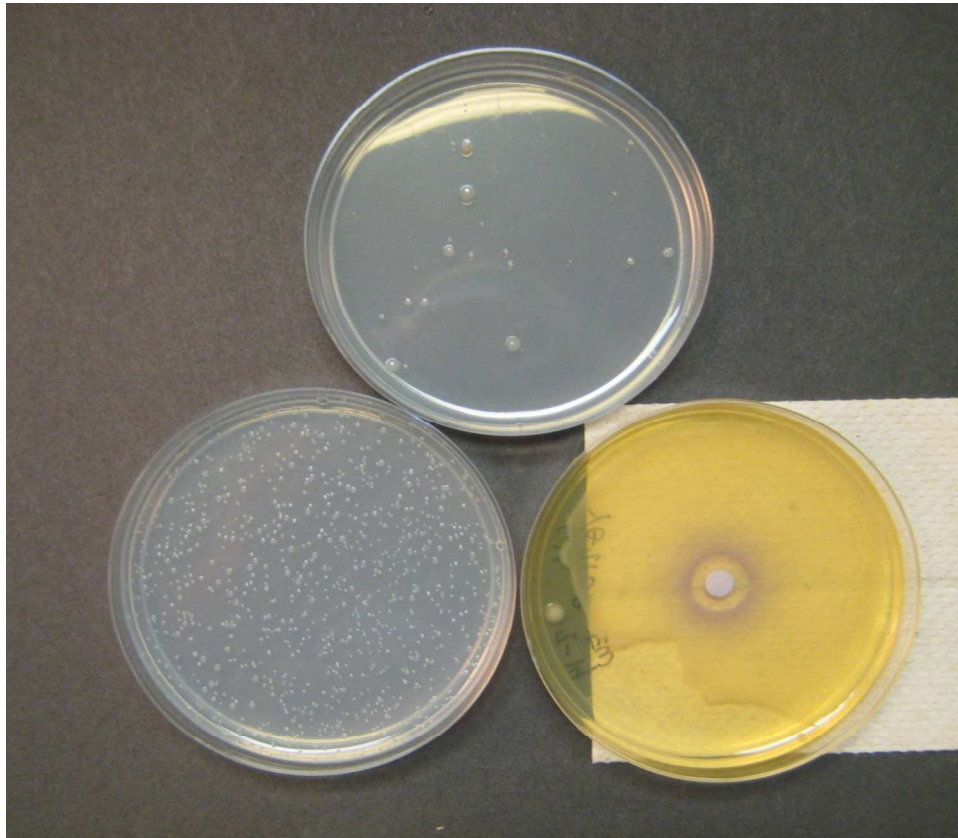

Figure S4. Diagnostic plates for the *S. typhimurium* microsuspension mutagenicity assay. A negative control is illustrated by the top plate, the left plate is the positive control *N*-nitrosodimethylamine and the right plate is the crystal violet *rfa*<sup>-</sup> plate showing a clear zone of inhibition.

136

To confirm the genotype of the YG7108 cells, 100  $\mu$ L of the titrated suspension was added to an LB plate, and spread with a flamed glass rod. Flamed tweezers were used to place a crystal violet disk onto the center of the plate, and the disk was tapped lightly in place. Due to



the presence of the *rfa* mutation,<sup>1</sup> the large molecules of crystal violet are able to enter and kill the YG7108 cells. This was indicated by a clear zone around the crystal violet disk (Figure S4).

### **Suspension Versus Plate Incorporation Assays**

We employed a quantitative microsuspension methodology for the *S. typhimurium* mutagenicity assay instead of the more commonly used plate incorporation assay method. An overall comparison is outlined in Table S2. In the plate incorporation method the cell titer is not determined; an aliquot (usually 100  $\mu$ L) of an overnight culture in complete growth medium is used. For the plate incorporation assay the test agent is added to a 2-mL volume of supplemented molten top agar along with the cells and  $\pm$  S9. The top agar is poured upon a VB minimal plate. Thus the actual exposure concentration to the cells is difficult to determine. It is impossible to calculate a molar concentration and usually a gram unit per plate is used to express the concentration. The volume during the exposure time for the cells is impossible to quantify. Cells are exposed in approximately 2 mL of molten top agar which is then poured onto a VB selective plate that consists of approximately 20 mL. The cells are retained in the top agar, but the test chemical diffuses throughout the approximately 22 mL volume of agar in the petri plate.

Another difficulty is that the test agent is in contact with S9 monooxygenase enzymes and co-factors first in the 2 mL overlay agar and then this volume changes when the contents are poured upon the VB plate. Finally, in the plate incorporation and preincubation methods no quantitative cytotoxicity measurement can be made. It is important that the *S. typhimurium* cells are not killed as the concentration of the test agent is increased throughout the concentration range.

| Table S2. Comparison between the plate incorporation method and the microsuspension method for the <i>S. typhimurium</i> mutagenicity assay |                                                                                                                                                                                                                                                                                                                   |                                                                                                                                                                                                                                                                                      |
|---------------------------------------------------------------------------------------------------------------------------------------------|-------------------------------------------------------------------------------------------------------------------------------------------------------------------------------------------------------------------------------------------------------------------------------------------------------------------|--------------------------------------------------------------------------------------------------------------------------------------------------------------------------------------------------------------------------------------------------------------------------------------|
| Metric                                                                                                                                      | Plate Incorporation Method                                                                                                                                                                                                                                                                                        | Microsuspension Method                                                                                                                                                                                                                                                               |
| Single colony isolate grown overnight in complete medium                                                                                    | Yes                                                                                                                                                                                                                                                                                                               | Yes                                                                                                                                                                                                                                                                                  |
| Centrifugation and washing bacteria before treatment                                                                                        | No                                                                                                                                                                                                                                                                                                                | Yes                                                                                                                                                                                                                                                                                  |
| Determination of titer before treatment (same number of cells treated for each experiment)                                                  | No                                                                                                                                                                                                                                                                                                                | Yes. By treating a consistent number of cells, the results can be presented in revertants per $10^8$ cells plated. This provides a uniform level of mutagenicity response.                                                                                                           |
| Treatment times can be adjusted                                                                                                             | No                                                                                                                                                                                                                                                                                                                | Yes                                                                                                                                                                                                                                                                                  |
| Precise control of concentration of test agents                                                                                             | No — With this method the test compound and bacteria are combined in 2 mL of molten agar and poured immediately onto a plate from which diffusion occurs throughout the plate. The concentration of agent can be expressed as the concentration in the treatment tube or as the concentration in the petri plate. | Yes — With this method a known number of bacteria are exposed to the agent while shaking for defined time periods. After treatment the mixture is added to molten agar and poured onto a petri plate. The concentration of agent is expressed as the concentration during treatment. |
| Determination of cytotoxicity                                                                                                               | Not possible. A background lawn that is thin or sparse is only qualitative and not a quantitative measure of toxicity.                                                                                                                                                                                            | Yes, an aliquot of treated cells may be serially diluted and plated onto complete medium, allowing for determination of toxicity.                                                                                                                                                    |

163

164 A qualitative visual inspection of the background lawn of cells is part of the plate incorporation

165 and preincubation procedures, but this is not a true measurement of cytotoxicity.

166 In the microsuspension assay that we employed for this report, *S. typhimurium* cells were

167 washed, titered, and a specific number of cells were exposed to a test agent in a known volume

168 of buffer with and without S9 for a specific time period. The concentrations of the test agent

169 were expressed in molar units. An aliquot of the suspension was reserved after treatment, serial

dilutions were prepared and known volumes were plated onto complete (LB) medium. All living cells grow on LB medium and we can determine if we are conducting the assay at concentrations of test chemical that do not induce a cytotoxic response. Thus, the microsuspension procedure is a quantitative assay that provides control over cell titer, a precise measure of cytotoxicity and an exact determination of the concentration of test agent to which a specific number of cells are exposed for a specific time period. This level of precision provides high quality data on the relative mutagenic capacities and allows for a quantitative comparison amongst the test chemicals.

### **Chinese Hamster Ovary (CHO) Cell Assays**

CHO cells are widely used for *in vitro* toxicology research. We employed CHO cell line AS52 clone 11-4-8 for the mammalian cell cytotoxicity and genotoxicity analyses of the agents generated for this project (Figure S5). This clone expresses a stable chromosome complement as well as functional p53 protein.<sup>10 11</sup> The CHO

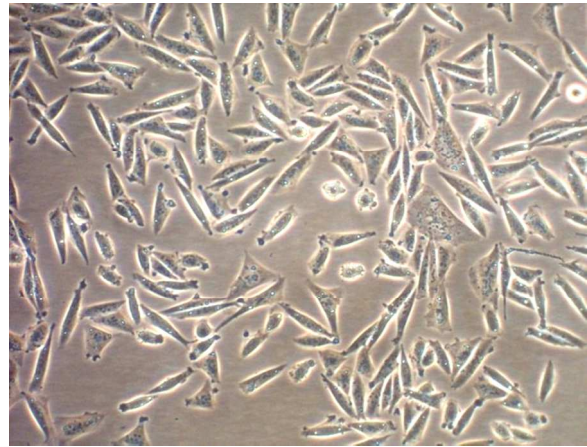

Figure S5. Photomicrograph of CHO AS52 cells, clone 11-4-8.

cells were maintained in Ham's F12 medium at 37°C in a humidified atmosphere of 5% CO<sub>2</sub>. The cells exhibit normal morphology, express cell contact inhibition and grow as a monolayer without expression of neoplastic foci (tumor cells). CHO cells were employed for the chronic cytotoxicity assay.<sup>12, 13</sup> Genomic DNA damage in CHO cells was analyzed with the single cell gel electrophoresis genotoxicity assay.<sup>14, 15</sup>

### **CHO Cell Chronic Cytotoxicity Assay**

The CHO cell microplate chronic cytotoxicity assay measures the reduction in cell density as a function of the concentration of the test agent over a 72 h period.<sup>12, 13</sup> A 96-well flat-bottomed microplate was used to evaluate a series of concentrations of specific chemical agents. One column of eight microplate wells served as the blank control consisting of 200  $\mu$ L of F12 + 5% fetal bovine serum (FBS) medium only. The concurrent negative control column consisted of eight wells with  $3 \times 10^3$  CHO cells plus F12 +FBS medium. The remaining wells within the experiment contained  $3 \times 10^3$  CHO cells, F12 +FBS and a known test agent concentration in a total of 200  $\mu$ L. The wells were covered with a sheet of sterile Alumna Seal™. The microplate was placed on a rocking platform at 37°C for two 5 min-periods (turning the plate 90° after the first 5 min). This step is important and ensures an even distribution of cells across the bottom of the microplate wells. The cells were incubated for 72 h at 37°C at 5% CO<sub>2</sub>. After the treatment time, the medium from each well was aspirated, the cells fixed in methanol for 10 min and stained for 10 min with a 1% crystal violet solution in 50% methanol. The microplate was washed, and 50  $\mu$ L of DMSO/methanol (3:1 v/v) was added to each well, and the plate incubated at room temperature for 10 min. The microplate was analyzed at 595 nm with a BioRad microplate reader; the absorbency of each well was recorded and stored on a spreadsheet file. This assay was calibrated and there is a direct relationship between the absorbency of the crystal violet dye associated with the cell and the number of viable cells.<sup>13</sup> The averaged absorbency of the blank wells was subtracted from the absorbency data from each microplate well. The mean blank-corrected absorbency value of the negative control was set at 100%. The absorbency for each treatment group well was converted into a percentage of the negative control. This procedure normalizes the data, maintains the variance and allows for the combination of data from multiple micro-

plates. The data were used to generate a concentration-response curve for each test agent. Regression analysis was applied to each test agent concentration-response curve, which was used to calculate the LC<sub>50</sub> value. The LC<sub>50</sub> is the calculated concentration of test agent that induced a cell density that was 50% of the negative control. The original absorbency data, the blank-corrected data and the conversion to the percent of the negative control values were saved on the spreadsheet for each test agent analyzed. This CHO cell chronic cytotoxicity assay described above cannot be used with mammalian microsomal metabolic activation because the S9 mix interferes with the crystal violet staining method.

### Single Cell Gel Electrophoresis Assay (SCGE)

The microplate SCGE assay was used to assess the genotoxicity and acute cytotoxicity of the test agents to CHO cells.<sup>13, 14</sup> SCGE is a sensitive assay that can quantitatively determine genomic DNA damage.<sup>15-18</sup> The SCGE assay detects genomic DNA strand breakage, DNA cross-links, alkali-labile sites and incomplete excision repair sites in individual nuclei. Upon electrophoresis in an agarose microgel, undamaged nuclei have few DNA fragments and appear as spheres when stained and viewed by fluorescence microscopy (Figure S6, top panel). Nuclei containing damaged DNA (including strand breaks and incomplete repair sites) exhibit a characteristic “comet tail” appearance after electrophoresis. Figure S6 illustrates nuclei from negative control cells (top panel), and

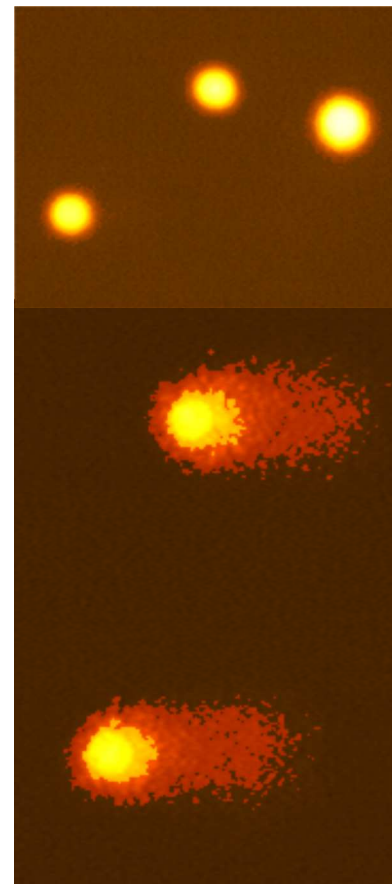

Figure S6. SCGE images of nuclei from negative control cells (top) and cells exposed to 800  $\mu$ M 2AAAF (bottom).

nuclei from cells damaged by 2-acetoxyacetylaminofluorene (2AAAF) (bottom panel). Using a digital camera, the amount of DNA that migrates away from the nucleus into the microgel (%Tail DNA) is a quantifiable direct measure of DNA damage.<sup>19</sup>

The day before treatment, CHO cells from maintenance plates were washed with Hanks Balanced Salt Solution and harvested with trypsin; a cell suspension was constructed with a titer of  $4 \times 10^5$  cells/mL. The contents of the microplate wells consisted of 100  $\mu$ L of F12 medium + 5% FBS and 100  $\mu$ L of the titered cell suspension. The microplate was placed on a rocking platform at 37°C for two 5 min-periods (turning the plate 90° after the first 5 min). This is very important and ensures an even distribution of cells across the bottom of the microplate wells. After rocking, the microplate was placed in the 5% CO<sub>2</sub> incubator. The following day the CHO cells were treated with a series of concentrations of the test agent for 4 h with or without S9 microsomal activation. We employed a microplate methodology<sup>14</sup> with an enhanced hepatic microsomal mix (S9B150) specifically designed for use with nitrosamines;<sup>6</sup> this consisted of 2 mM MgCl<sub>2</sub>, 6 mM KCl, 1.5 mM glucose-6-phosphate, 1.2 mM NADP, 10 mM sodium phosphate buffer, pH 7.4, 2 mM CaCl<sub>2</sub> and 3.36% (v/v) S9 fraction. A typical experimental design included a negative control (F12 medium without FBS), 9 concentrations of the test agent (in F12 without FBS) and an appropriate positive control. We employed the direct-acting alkylating agent ethylmethanesulfonate for the –S9 positive control and NDMA as the +S9 positive control. In experiments without S9 metabolic activation the total volume in each well was 25  $\mu$ L. With S9 metabolic activation an increase in the total volume to 100  $\mu$ L was required. After treatment, the cells were washed and harvested with trypsin. A 10  $\mu$ l aliquot was removed to measure acute cytotoxicity using the trypan blue vital dye exclusion assay to ensure that the cells were exposed to sub-lethal concentrations.<sup>12, 20</sup>

After embedding the remaining cells in agarose microgels, the cell membranes were lysed, and the nuclei were electrophoresed. After staining with the fluorescent DNA binding dye, ethidium bromide, the microgels were analyzed with a Zeiss fluorescence microscope with an excitation filter of BP 546/10 nm and a barrier filter of 590 nm. A computerized image analysis system was used to measure a number of specific SCGE parameters of 25 randomly chosen nuclei per microgel. The intensity of the DNA that migrated away from the nucleus (%Tail DNA) was the primary metric of DNA damage that was used for the concentration-response curves.

#### Comparison of CHO Cell Cytotoxicity and Genotoxicity Among the Nitrosamines and Nitramines

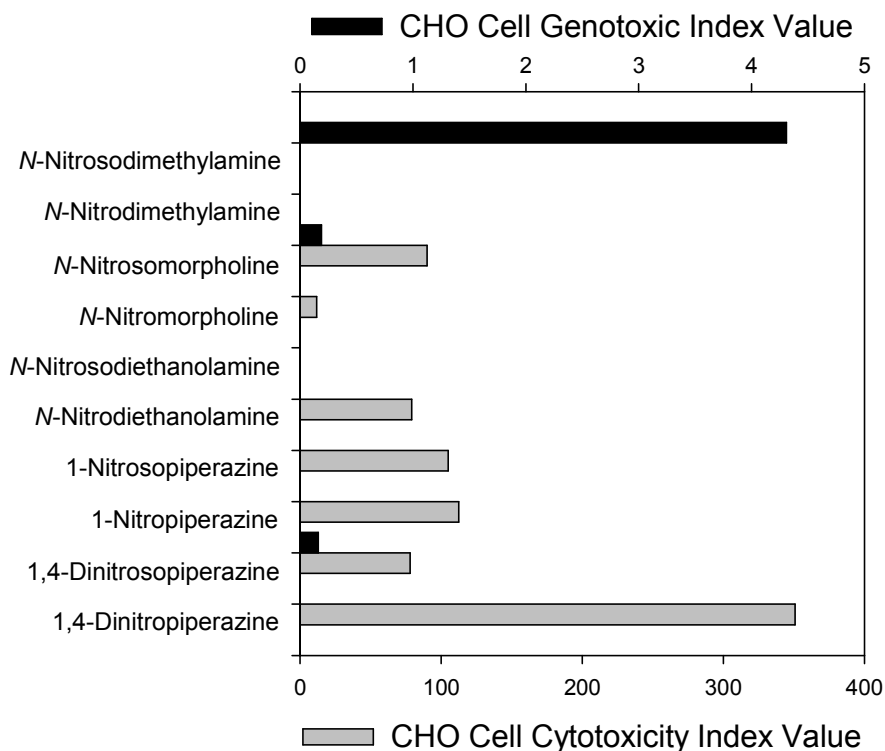

Figure S7. Comparison between the direct chronic CHO cell cytotoxicity (gray bars) and acute SCGE genotoxicity (black bars) of the nitrosamine and nitramine test chemicals analyzed in this study. The cytotoxicity index =  $(LC_{50})^{-1}(10^3)$  and the genotoxic index is the reciprocal of the SCGE 50% Tail DNA value  $\times 10^4$ .

276 **Comparison Between CHO Cell Genotoxicity with *S. typhimurium* Mutagenicity**

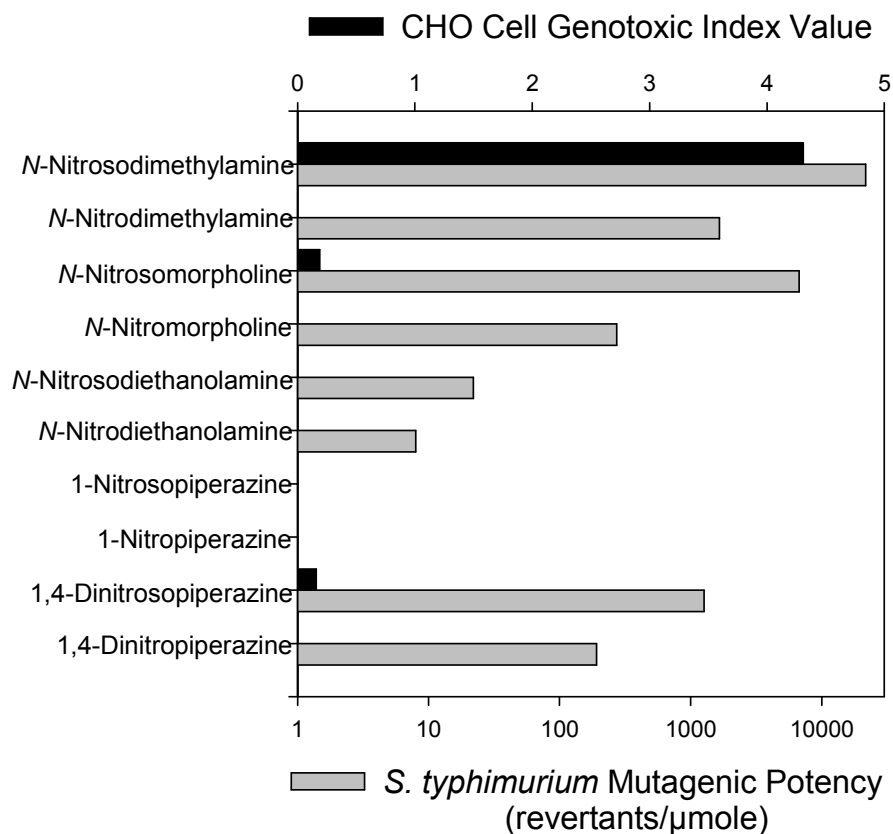

278  
279 Figure S8. Comparison between mutagenicity in *S. typhimurium*  
280 YG7108 (gray bars) and genotoxicity in CHO cells (black bars). The  
281 CHO cell genotoxic index is the reciprocal of the SCGE 50% Tail  
DNA value  $\times 10^4$ .



285

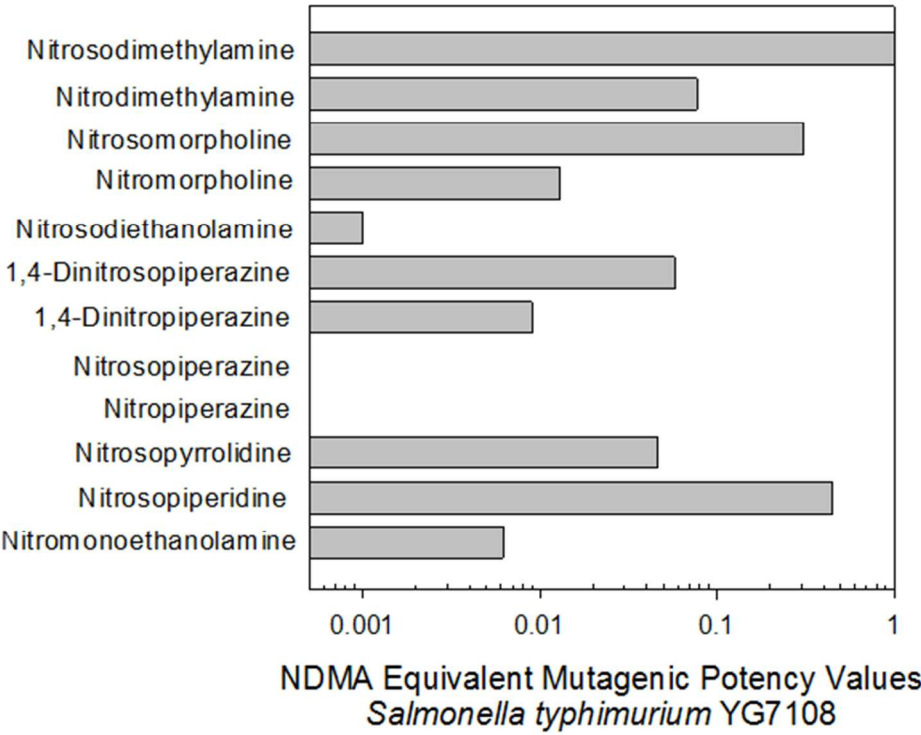

286

287 Figure S9. A comparison of the *N*-nitrosodimethylamine  
288 equivalent mutagenicity values for agents positive in *S. typhi-*  
289 *murium* strain YG7108 +S9 metabolic activation.  
290  
291

## References

1. Maron, D. M.; Ames, B. N., Revised methods for the Salmonella mutagenicity test. *Mutat.Res.* **1983**, *113*, (3-4), 173-215.
2. Claxton, L. D.; Umbuzeiro, G. d.; DeMarini, D. M., The Salmonella mutagenicity assay: The stethoscope of genetic toxicology for the 21st century. *Environ. Health Perspect.* **2010**, *118*, (11), 1515-1522.
3. Yamada, M.; Matsui, K.; Sofuni, T.; Nohmi, T., New tester strains of Salmonella typhimurium lacking O<sup>6</sup>-methylguanine DNA methyltransferases and highly sensitive to mutagenic alkylating agents. *Mutat.Res.* **1997**, *381*, 15-24.
4. Kargalioglu, Y.; McMillan, B. J.; Minear, R. A.; Plewa, M. J., Analysis of the cytotoxicity and mutagenicity of drinking water disinfection by-products in *Salmonella typhimurium*. *Teratogen. Carcinogen. Mutagen.* **2002**, *22*, (2), 113-128.
5. Kargalioglu, Y.; McMillan, B. J.; Minear, R. A.; Plewa, M. J., A new assessment of the cytotoxicity and genotoxicity of drinking water disinfection by-products. In *Natural Organic Matter and Disinfection By-Products: Characterization and Control in Drinking Water*, Barrett, S. E.; Krasner, S. W.; Amy, G. L., Eds. American Chemical Society: Washington, D.C., 2000; pp 16-27.
6. Wagner, E. D.; Hsu, K. M.; Lagunas, A.; Mitch, W. A.; Plewa, M. J., Comparative genotoxicity of nitrosamine drinking water disinfection byproducts in *Salmonella* and mammalian cells. *Mutat.Res.* **2012**, *741*, 109-115.
7. Timbrell, J. A., *Principles of Biochemical Toxicology*. Taylor and Francis Ltd.: London, 1987; p 248.
8. Suzuki, E.; Mochizuki, M.; Sekiguchi, N.; Osabe, M.; Okada, M., In vitro metabolism of N-nitrodialkylamines. *Jpn. J. Cancer Res.* **1985**, *76*, (1), 28-36.
9. Malaveille, C.; Croisy, A.; Brun, G.; Bartsch, H., Hydroxylation and nitroreduction are required to activate dimethylnitramine into alkylating and mutagenic agents. *Carcinogenesis* **1983**, *4*, (11), 1477-1481.
10. Wagner, E. D.; Rayburn, A. L.; Anderson, D.; Plewa, M. J., Analysis of mutagens with single cell gel electrophoresis, flow cytometry, and forward mutation assays in an isolated clone of Chinese hamster ovary cells. *Environ. Mol. Mutagen.* **1998**, *32*, (4), 360-368.
11. Tzang, B. S.; Lai, Y. C.; Hsu, M.; Chang, H. W.; Chang, C. C.; Huang, P. C.; Liu, Y. C., Function and sequence analyses of tumor suppressor gene p53 of CHO.K1 cells. *DNA Cell Biol.* **1999**, *18*, (4), 315-321.
12. Plewa, M. J.; Wagner, E. D., *Mammalian Cell Cytotoxicity and Genotoxicity of Disinfection By-Products*. Water Research Foundation: Denver, CO, 2009; p 134.
13. Plewa, M. J.; Kargalioglu, Y.; Vanker, D.; Minear, R. A.; Wagner, E. D., Mammalian cell cytotoxicity and genotoxicity analysis of drinking water disinfection by-products. *Environ. Mol. Mutagen.* **2002**, *40*, (2), 134-142.
14. Wagner, E. D.; Plewa, M. J., Microplate-based comet assay. In *The Comet Assay in Toxicology*, Dhawan, A.; Anderson, D., Eds. Royal Society of Chemistry: London, 2009; pp 79-97.
15. Tice, R. R.; Agurell, E.; Anderson, D.; Burlinson, B.; Hartmann, A.; Kobayashi, H.; Miyamae, Y.; Rojas, E.; Ryu, J. C.; Sasaki, Y. F., Single cell gel/comet assay: guidelines

- for in vitro and in vivo genetic toxicology testing. *Environ. Mol. Mutagen.* **2000**, *35*, (3), 206-221.
16. Anderson, D.; Yu, T. W.; McGregor, D. B., Comet assay responses as indicators of carcinogen exposure. *Mutagenesis* **1998**, *13*, (6), 539-555.
17. Rundell, M. S.; Wagner, E. D.; Plewa, M. J., The comet assay: genotoxic damage or nuclear fragmentation? *Environ. Mol. Mutagen.* **2003**, *42*, (2), 61-67.
18. Fairbairn, D. W.; Olive, P. L.; O'Neill, K. L., The comet assay: a comprehensive review. *Mutat.Res.* **1995**, *339*, (1), 37-59.
19. Kumaravel, T. S.; Jha, A. N., Reliable Comet assay measurements for detecting DNA damage induced by ionising radiation and chemicals. *Mutat.Res.* **2006**, *605*, (1-2), 7-16.
20. Phillips, H. J., Dye exclusion tests for cell viability. In *Tissue Culture: Methods and Applications*, Kruse, P. F.; Patterson, M. J., Eds. Academic Press: New York, 1973; p 406.
